# Supplementary material
Source: PubMed Central journal article supplement (PMC3992878)
Supplement: NIHMS425478-supplement-1.pdf [file NIHMS425478-supplement-1.pdf]

## Supplementary Information

### Rapid Adaptation to Food Availability by a Dopamine-Mediated Morphogenetic Response

Diane K. Adams<sup>1</sup>, Mary A. Sewell<sup>2</sup>, Robert C. Angerer<sup>1</sup>, and Lynne M. Angerer<sup>1</sup>

<sup>1</sup> *National Institute of Dental and Craniofacial Research, National Institutes of Health, Bethesda, MD 20892 USA.*

<sup>2</sup> *School of Biological Sciences, University of Auckland, Auckland 1142, New Zealand.*

*Correspondence and requests for materials should be addressed to D.K.A. (email: [adamsdi@mail.nih.gov](mailto:adamsdi@mail.nih.gov)).*

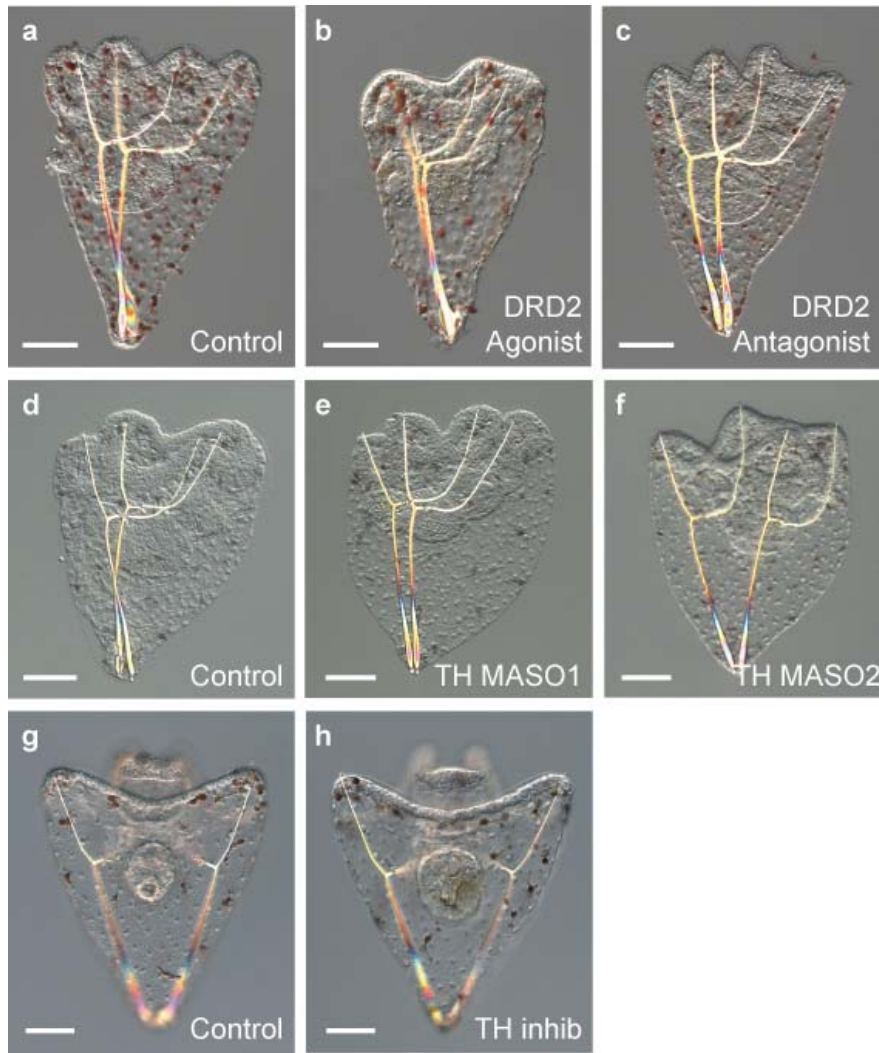

**Supplementary Figure S1. Normal gross development and skeletal patterning.**

Differential interference contrast images of 5-day larvae showing normal gross development and skeletal patterning in all treatments. (a, d, g) Controls; (b) DRD2 agonist, quinpirole 50  $\mu\text{M}$ ; (c) DRD2 antagonist, amisulpride 25  $\mu\text{M}$ ; (e) TH MASO1, 0.4 mM; (f) TH MASO2, 0.15 mM; (h) TH inhibitor,  $\alpha$ -Methyl-DL-tyrosine methyl ester hydrochloride, 10 nM. Scale bars, 50  $\mu\text{m}$ . DRD2, dopamine receptor type-D2; TH, tyrosine hydroxylase; MASO, morpholino anti-sense oligonucleotide.

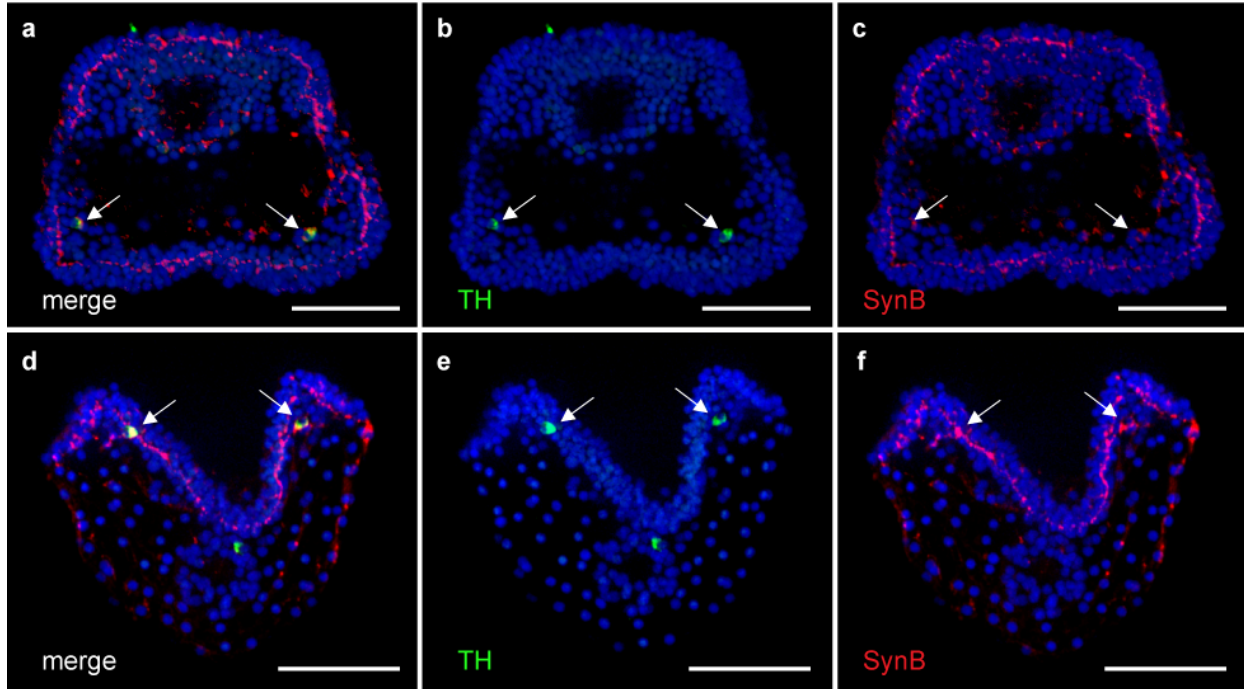

**Supplementary Figure S2. Co-localization of Tyrosine Hydroxylase and Synaptotagmin B in the arm tips.** (a-c) Oral view and (d-f) vegetal view of 96 h post-fertilization plutei. TH, Tyrosine Hydroxylase. SynB, Synaptotagmin B. Scale bars, 50  $\mu\text{m}$ .

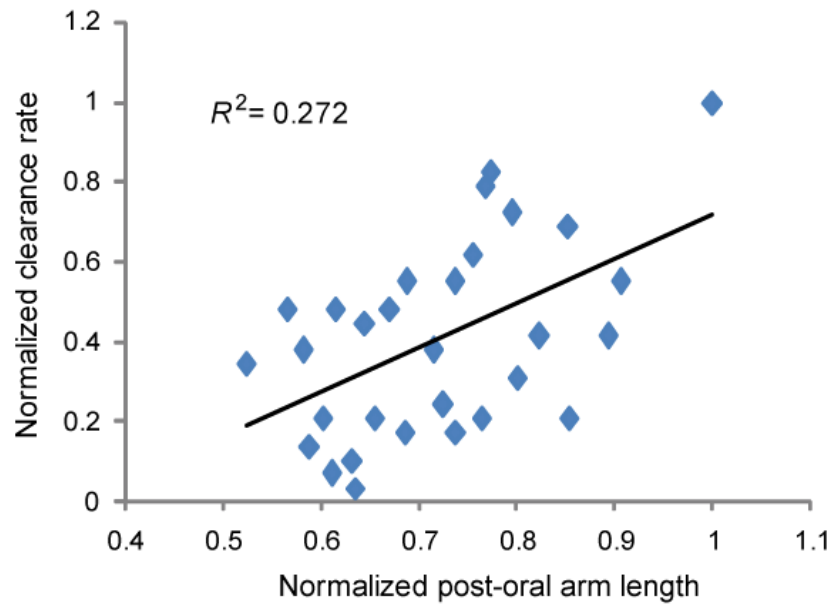

**Supplementary Figure S3. Regression of clearance rate and post-oral arm length in feeding trials with a high concentration of food mimics, 4,000 beads  $\text{ml}^{-1}$ .** Both variables were normalized relative to the maximum. Model I Regression,  $R^2 = 0.272$ ,  $\beta_1 = 1.116$ ,  $P = 0.003$ ,  $n = 30$ .

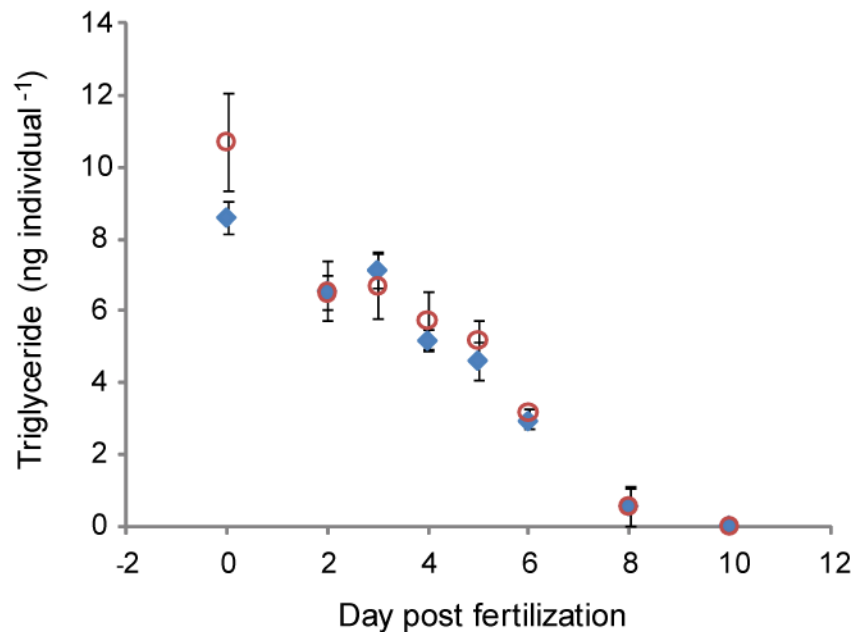

**Supplementary Figure S4. Use of maternal triglycerides through embryogenesis (days 0 – 5) and the early larval stage (days 6-10).** Circles and diamonds denote replicate cultures. Model I Regression,  $\beta_1 = -0.997 \pm 0.06$  S.D.,  $R^2 = 0.95$ ,  $P < 0.0001$ ,  $n = 16$ . Error bars  $\pm$  S.E.M.

| <b>Post-oral arm</b> | SS         | df  | MS        | F-ratio | P-value |
|----------------------|------------|-----|-----------|---------|---------|
|                      |            |     | 46039.89  |         |         |
| Replicate            | 46039.890  | 1   | 0         | 85.988  | < 0.001 |
|                      |            |     | 30868.78  |         |         |
| DRD2                 | 30868.788  | 1   | 8         | 57.653  | < 0.001 |
| Algae                | 11653.661  | 1   | 11653.661 | 21.765  | < 0.001 |
| DRD2×Algae           | 3750.637   | 1   | 3750.637  | 7.005   | 0.008   |
| Replicate×Algae      | 1017.780   | 1   | 1017.780  | 1.901   | 0.169   |
| DRD2×Replicate       | 535.786    | 1   | 535.786   | 1.001   | 0.318   |
| Replicate×DRD2×Algae | 113.652    | 1   | 113.652   | 0.212   | 0.645   |
| Error                | 194357.898 | 363 | 535.421   |         |         |
| <b>Body rod</b>      |            |     |           |         |         |
| Replicate            | 5359.382   | 1   | 5359.382  | 18.115  | < 0.001 |
| DRD2                 | 2770.954   | 1   | 2770.954  | 9.366   | 0.002   |
| Algae                | 305.124    | 1   | 305.124   | 1.031   | 0.311   |
| DRD2×Algae           | 468.705    | 1   | 468.705   | 1.584   | 0.209   |
| Replicate×Algae      | 874.169    | 1   | 874.169   | 2.955   | 0.087   |
| DRD2×Replicate       | 319.474    | 1   | 319.474   | 1.080   | 0.299   |
| Replicate×DRD2×Algae | 588.375    | 1   | 588.375   | 1.989   | 0.159   |
| Error                | 102071.800 | 345 | 295.860   |         |         |

**Supplementary Table S1.** Model I ANOVA for perturbations with amisulpride, a selective dopamine type-D<sub>2</sub> receptor (DRD2) antagonist. Differences in the degrees of freedom were due to non-measurable skeletal elements due to breakage or exit from the plane of focus. SS, Sum of Squares; df, degrees of freedom; MS, Mean Square.

| <b>Post-oral arm</b>     | SS         | df  | MS       | F-ratio | P-value |
|--------------------------|------------|-----|----------|---------|---------|
| Replicate                | 2308.425   | 1   | 2308.425 | 4.844   | 0.029   |
| TH MASO1                 | 10597.750  | 1   | 10597.75 | 22.237  | < 0.001 |
| Algae                    | 5730.493   | 1   | 5730.493 | 12.024  | 0.001   |
| TH MASO1×Algae           | 9342.748   | 1   | 9342.748 | 19.604  | < 0.001 |
| Replicate×Algae          | 1831.687   | 1   | 1831.687 | 3.843   | 0.051   |
| TH MASO1×Replicate       | 1860.678   | 1   | 1860.678 | 3.904   | 0.049   |
| Replicate×TH MASO1×Algae | 46.876     | 1   | 46.876   | 0.098   | 0.754   |
| Error                    | 136300.400 | 286 | 476.575  |         |         |
| <b>Bodyrod</b>           |            |     |          |         |         |
| Replicate                | 2724.590   | 1   | 2724.590 | 7.406   | 0.007   |
| TH MASO1                 | 1024.481   | 1   | 1024.481 | 2.785   | 0.096   |
| Algae                    | 231.370    | 1   | 231.370  | 0.629   | 0.428   |
| TH MASO1×Algae           | 132.057    | 1   | 132.057  | 0.359   | 0.55    |
| Replicate×Algae          | 22.403     | 1   | 22.403   | 0.061   | 0.805   |
| TH MASO1×Replicate       | 1822.730   | 1   | 1822.730 | 4.955   | 0.027   |
| Replicate×TH MASO1×Algae | 1032.681   | 1   | 1032.681 | 2.807   | 0.095   |
| Error                    | 104845.40  | 285 | 367.879  |         |         |

**Supplementary Table S2.** Model I ANOVA for perturbations with tyrosine hydroxylase morpholino 1 (TH MASO1). Differences in the degrees of freedom were due to non-measurable skeletal elements due to breakage or exit from the plane of focus. SS, Sum of Squares; df, degrees of freedom; MS, Mean Square.

| <b>Post-oral arm</b>     | SS         | df  | MS        | F-ratio | P       |
|--------------------------|------------|-----|-----------|---------|---------|
|                          |            |     | 182456.40 | 420.30  |         |
| Replicate                | 182456.400 | 1   | 0         | 3       | < 0.001 |
| TH inhib                 | 85.606     | 1   | 85.606    | 0.197   | 0.657   |
| Algae                    | 9665.322   | 1   | 9665.322  | 22.265  | < 0.001 |
| TH inhib×Algae           | 5950.604   | 1   | 5950.604  | 13.708  | < 0.001 |
| Replicate×Algae          | 763.367    | 1   | 763.367   | 1.758   | 0.186   |
| TH inhib×Replicate       | 251.916    | 1   | 251.916   | 0.580   | 0.447   |
| Replicate×TH inhib×Algae | 118.249    | 1   | 118.249   | 0.272   | 0.602   |
| Error                    | 130231.900 | 300 | 434.106   |         |         |
| <b>Bodyrod</b>           |            |     |           |         |         |
| Replicate                | 17447.420  | 1   | 17447.420 | 57.554  | < 0.001 |
| TH inhib                 | 195.288    | 1   | 195.288   | 0.644   | 0.423   |
| Algae                    | 0.005      | 1   | 0.005     | 0.000   | 0.997   |
| TH inhib×Algae           | 18.217     | 1   | 18.217    | 0.060   | 0.807   |
| Replicate×Algae          | 195.053    | 1   | 195.053   | 0.643   | 0.423   |
| TH inhib×Replicate       | 143.105    | 1   | 143.105   | 0.472   | 0.493   |
| Replicate×TH inhib×Algae | 77.521     | 1   | 77.521    | 0.256   | 0.614   |
| Error                    | 79424.820  | 262 | 303.148   |         |         |

**Supplementary Table S3.** Model I ANOVA for perturbations with tyrosine hydroxylase inhibitor,  $\alpha$ -methyl-p-tyrosine. Differences in the degrees of freedom were due to non-measurable skeletal elements due to breakage or exit from the plane of focus. SS, Sum of Squares; df, degrees of freedom; MS, Mean Square.
